# Supplementary material
Source: ML conference proceedings conference paper supplement (https://proceedings.neurips.cc/paper_files/paper/2023/hash/4a4a3c197deac042461c677219efd36c-Abstract.html)
Supplement: Supplementary file 1 [file 4a4a3c197deac042461c677219efd36c-Supplemental-Conference.pdf]

## A Proof and Derivations

### A.1 Proof of Theorem 2.1

The existence is straightforward, since  $\text{FD}(\tilde{p}_d || \tilde{q}_{\theta^*}) = 0 \rightarrow \tilde{p}_d = \tilde{q}_{\theta^*}$ , we can simply let  $q(x) = p_d(x)$ , which makes  $\int q(x)p(\tilde{x}|x) dx = \int p_d(x)p(\tilde{x}|x) dx = \tilde{p}_d$ . To show the uniqueness, we denote density  $k(\epsilon) = \mathcal{N}(0, \sigma^2 I)$ , so  $\tilde{q}_{\theta}(\tilde{x})$  and  $\tilde{p}_d(\tilde{x})$  can be written as convolutions

$$\tilde{q}_{\theta}(\tilde{x}) = q * k, \quad \tilde{p}_d(\tilde{x}) = p_d * k, \quad (20)$$

we then have

$$\tilde{p}_d = \tilde{q}_{\theta} \Leftrightarrow q * k = p_d * k \Leftrightarrow \mathcal{F}(q)\mathcal{F}(k) = \mathcal{F}(p_d)\mathcal{F}(k), \quad (21)$$

where  $\mathcal{F}$  denotes the Fourier transform. Since the Fourier transform of a Gaussian is also a Gaussian, so  $\mathcal{F}(k) > 0$  everywhere, we have

$$\tilde{p}_d = \tilde{q}_{\theta^*} \Leftrightarrow \mathcal{F}(q)\cancel{\mathcal{F}(k)} = \mathcal{F}(p_d)\cancel{\mathcal{F}(k)} \Leftrightarrow \mathcal{F}(q) = \mathcal{F}(p_d) \Leftrightarrow q = p_d. \quad (22)$$

Therefore,  $q = p_d$  is the unique distribution that makes  $\tilde{p}_d = \tilde{q}_{\theta}$ . This technique has also been used to construct spread KL divergence (we denote as  $\widetilde{\text{KL}}$ ) [46], which is defined as  $\widetilde{\text{KL}}(p_d || q_{\theta}) \equiv \text{KL}(p_d * k || q_{\theta} * k)$  where  $k(\epsilon) = \mathcal{N}(0, \sigma^2 I)$ , to train implicit model  $q_{\theta}$ . Different from the DSM situation, when  $\widetilde{\text{KL}}(p_d || q_{\theta}) = 0$ , the underlying model  $q_{\theta} = p_d$  is directly available, whereas the EBM  $\tilde{q}_{\theta}$  trained by DSM learns to be the noisy distribution  $\tilde{q}_{\theta} = p_d * k$ .

### A.2 General Conditions Characterising the Existence of the Clean Model

In the previous section, we assume for a flexible neural network parameterized  $f_{\theta}$ , the energy-based model  $\tilde{q}_{\theta}(\tilde{x}) = \exp(-f_{\theta}(\tilde{x}))/Z(\theta)$  trained by Equation 5 can recover the target noisy data distribution  $\tilde{q}_{\theta^*} = \tilde{p}_d$  so there exists an underlying model  $q$  such that  $\tilde{q}_{\theta^*} = q * k$  and  $q = p_d$ . This assumption is commonly used in the literature on score-based methods. For example, in the score-based diffusion models literature [32, 13, 2], for any data  $x \in \mathbb{R}^D$ , the score function  $\nabla_{\tilde{x}} \log \tilde{q}_{\theta}(\tilde{x})$  is usually parameterized by a neural network  $\text{NN}_{\theta}(\cdot) : \mathbb{R}^D \rightarrow \mathbb{R}^D$ . However, this parameterization cannot guarantee  $\text{NN}_{\theta}(\tilde{x})$  is a conservative vector field, or in other words, there doesn't exist a distribution  $\tilde{q}_{\theta}(\tilde{x})$  such that  $\nabla_{\tilde{x}} \log \tilde{q}_{\theta}(\tilde{x}) = \nabla_{\tilde{x}} \log \tilde{q}_{\theta}(\tilde{x})$  and  $\nabla_{\tilde{x}}^2 \log \tilde{q}_{\theta}(\tilde{x})$  is symmetric [29, 30]. Therefore, perfect score estimation  $\nabla_{\tilde{x}} \log \tilde{p}_d(\tilde{x}) = \nabla_{\tilde{x}} \log \tilde{q}_{\theta}(\tilde{x})$  is implicitly assumed to allow an EBM interpretation.

However, the underlying clean model doesn't always exist for imperfect model  $\tilde{q}_{\theta} \neq \tilde{p}_d$ . We here provide the sufficient and necessary conditions which guarantee the existence of the underlying clean model.

**Theorem A.1** (Necessary and Sufficient conditions for the existence of the underlying clean model.). *For a model  $\tilde{q}_{\theta}$  with the convolutional noise distribution  $k(\epsilon) = \mathcal{N}(0, \sigma^2 I)$ , there exists an underlying model  $q$  such that  $q * k = \tilde{q}_{\theta}$  if and only if  $\mathcal{F}(\tilde{q}_{\theta})/\mathcal{F}(k)$  is positive semi-definite<sup>7</sup>. Additionally, the underlying distribution  $q$  can be written as*

$$q = \mathcal{F}^{-1}(\mathcal{F}(\tilde{q}_{\theta})/\mathcal{F}(k)), \quad (23)$$

where  $\mathcal{F}^{-1}$  is the inverse Fourier transform. This theorem is a straightforward corollary of Bochner's Theorem<sup>8</sup>. However, for the energy model  $\tilde{q}_{\theta}(\tilde{x}) \propto \exp(-f_{\theta}(\tilde{x}))$ , it's difficult to design a functioning family of  $f$  that satisfies the positive semi-definite condition and have the tractable score function at the same time<sup>9</sup>. We thus leave the design of better energy function parameterizations as a promising future direction.

<sup>7</sup>A continuous function  $f : \mathbb{R}^d \rightarrow \mathbb{C}$  is positive semi-definite if for all  $n \in \mathbb{N}$ , all sets of pairwise distinct centers  $X = \{x_1, \dots, x_n\} \in \mathbb{R}^d$  and all  $\alpha \in \mathbb{C}^n$ ,  $\sum_{i=1}^n \sum_{j=1}^n \alpha_i \bar{\alpha}_j f(x_i - x_j) \geq 0$ , see [41, Definition 6.1]

<sup>8</sup>Bochner's Theorem [41, Theorem 6.6]: A continuous function  $f : \mathbb{R}^d \rightarrow \mathbb{C}$  is positive semi-definite if and only if it is the Fourier transform of a finite non-negative Borel measure on  $\mathbb{R}^d$ .

<sup>9</sup>For example, one can define a noisy energy-based model  $\tilde{q}_{\theta} = \exp(-f_{\theta}(\tilde{x}))/Z(\theta)$  with  $-f_{\theta}(\tilde{x}) = \int (g_{\theta}(x) + 1/\sigma^2 \|\tilde{x} - x\|_2^2) dx$ , which always allows an underlying clean energy-based model  $q_{\theta}(x) = \exp(-g_{\theta}(x))/Z(\theta)$  such that  $\tilde{q}_{\theta}(\tilde{x}) = q_{\theta}(x) * k$  with  $k(\epsilon) = \mathcal{N}(0, \sigma^2 I)$ . However, the score function  $\nabla_{\tilde{x}} \log \tilde{q}_{\theta}(\tilde{x}) = -\nabla_{\tilde{x}} f_{\theta}(\tilde{x})$  is intractable in this case.

### A.3 Proof of Theorem 2.2

#### Derivation of the Mean Identity

We let  $\tilde{q}_\theta(\tilde{x}) = \int k(\tilde{x}|x)q_\theta(x) dx$ , where  $k(\tilde{x}|x) = \mathcal{N}(0, \sigma^2 I)$ , we have

$$\begin{aligned}\nabla_{\tilde{x}} \log \tilde{q}_\theta(\tilde{x}) &= \frac{\nabla_{\tilde{x}} \tilde{q}_\theta(\tilde{x})}{\tilde{q}_\theta(\tilde{x})} = \frac{\int \nabla_{\tilde{x}} k(\tilde{x}|x) q_\theta(x) dx}{q_\theta(x)} \\ &= -\frac{1}{\sigma^2} \int \left( (\tilde{x} - x) \frac{k(\tilde{x}|x) q_\theta(x)}{\tilde{q}_\theta(\tilde{x})} \right) dx \\ \implies \sigma^2 \nabla_{\tilde{x}} \log \tilde{q}_\theta(\tilde{x}) + \tilde{x} &= \int x \frac{k(\tilde{x}|x) q_\theta(x)}{\tilde{q}_\theta(\tilde{x})} dx = \langle x \rangle_{q_\theta(x|\tilde{x})}\end{aligned}$$

where we define the model denoising posterior using Bayes rule  $q_\theta(x|\tilde{x}) \equiv k(\tilde{x}|x)q_\theta(x)/\tilde{q}_\theta(\tilde{x})$ . The second equality is due to the following Gaussian distribution property

$$\nabla_{\tilde{x}} k(\tilde{x}|x) = \frac{1}{\sqrt{2\pi\sigma^2}} \nabla_{\tilde{x}} e^{-\frac{(\tilde{x}-x)^2}{2\sigma^2}} = -\frac{\tilde{x}-x}{\sigma^2} \frac{1}{\sqrt{2\pi\sigma^2}} e^{-\frac{(\tilde{x}-x)^2}{2\sigma^2}} = -\frac{\tilde{x}-x}{\sigma^2} k(\tilde{x}|x). \quad (24)$$

#### Derivations of the Analytical Full Covariance Identity

We have derived the mean identity

$$\mu_q(\tilde{x}) \equiv \langle x \rangle_{q_\theta(x|\tilde{x})} = \sigma^2 \nabla_{\tilde{x}} \log \tilde{q}_\theta(\tilde{x}) + \tilde{x}. \quad (25)$$

Taking the gradient over  $x$  in both side and scaling with  $\sigma^2$ , we have

$$\sigma^2 \nabla_x \mu_q(\tilde{x}) = \sigma^4 \nabla_{\tilde{x}}^2 \log \tilde{q}_\theta(\tilde{x}) + \sigma^2 I. \quad (26)$$

We can also expand the hessian of the  $\log \tilde{q}_\theta(\tilde{x})$ :

$$\begin{aligned}\nabla_{\tilde{x}}^2 \log \tilde{q}_\theta(\tilde{x}) &= -\frac{1}{\sigma^2} \int \nabla_{\tilde{x}} \left( (\tilde{x} - x) \frac{k(\tilde{x}|x) p_\theta(x)}{\tilde{p}_\theta(\tilde{x})} \right) dx \\ &= -\frac{1}{\sigma^2} \int \frac{k(\tilde{x}|x) p_\theta(x)}{\tilde{p}_\theta(\tilde{x})} dx + \frac{1}{\sigma^2} \int (\tilde{x} - x) \frac{\nabla_{\tilde{x}} k(\tilde{x}|x) \tilde{p}_\theta(\tilde{x}) p_\theta(x) - \nabla \tilde{p}_\theta(\tilde{x}) k(\tilde{x}|x) p_\theta(x)}{\tilde{p}_\theta^2(\tilde{x})} dx \\ \implies \sigma^2 \nabla_{\tilde{x}}^2 \log \tilde{q}_\theta(\tilde{x}) + 1 &= \int (\tilde{x} - x) \frac{\nabla_{\tilde{x}} k(\tilde{x}|x) p_\theta(x) - \nabla \log \tilde{q}_\theta(\tilde{x}) k(\tilde{x}|x) p_\theta(x)}{\tilde{q}_\theta(\tilde{x})} dx \\ &= \int (\tilde{x} - x) \frac{-\frac{1}{\sigma^2} (\tilde{x} - x) k(\tilde{x}|x) p_\theta(x) + \frac{1}{\sigma^2} (\tilde{x} - \langle x \rangle_{p_\theta(x|\tilde{x})}) k(\tilde{x}|x) p_\theta(x)}{\tilde{q}_\theta(\tilde{x})} dx \\ \implies \sigma^4 \nabla_{\tilde{x}}^2 \log \tilde{q}_\theta(\tilde{x}) + \sigma^2 I &= \int \left( -(\tilde{x} - x)^2 + (\tilde{x} - x)(\tilde{x} - \langle x \rangle_{p_\theta(x|\tilde{x})}) \right) p_\theta(x|\tilde{x}) dx \\ &= \langle x^2 \rangle_{p_\theta(x|\tilde{x})} - \langle x \rangle_{p_\theta(x|\tilde{x})}^2 \equiv \Sigma_q(\tilde{x})\end{aligned}$$

Therefore, we obtain the analytical full covariance identity.

$$\Sigma_q(\tilde{x}) = \sigma^2 \nabla_{\tilde{x}} \mu_q(\tilde{x}). \quad (27)$$

### A.4 Proof of Theorem 2.3

**Lemma A.2** (KL to Gaussian [2]). *Let  $p(x)$  be a distribution with mean  $\mu_p$  and covariance  $\Sigma_p$  and  $q(x) = \mathcal{N}(\mu_q, \Sigma_q)$ , denote the differential entropy as  $H(p) \equiv -\int p(x) \log p(x) dx$ , we have*

$$\text{KL}(p||q) = \text{KL}(\mathcal{N}(\mu_p, \Sigma_p)||q) + H(\mathcal{N}(\mu_p, \Sigma_p)) - H(p) \quad (28)$$

The proof can be found in [2] Lemma 2.

We can then prove Theorem 2.3. Since  $p(\tilde{x}|x)p_d(x) = p(x|\tilde{x})\tilde{p}_d(\tilde{x})$ , where  $\tilde{p}_d(\tilde{x}) = \int p_d(x)p(\tilde{x}|x) dx$ , we have

$$\text{KL}(p(\tilde{x}|x)p_d(x)||q(x|\tilde{x})\tilde{p}_d(\tilde{x})) = \langle \text{KL}(p(x|\tilde{x})||q(x|\tilde{x})) \rangle_{\tilde{p}(\tilde{x})} \quad (29)$$

Assume Gaussian distribution  $q(x|\tilde{x}) = \mathcal{N}(\mu_q(\tilde{x}), \Sigma_q(\tilde{x}))$  and denote the mean and covariance of the true posterior are  $\mu_p(\tilde{x})$  and  $\Sigma_p(\tilde{x})$ , then the optimal  $q^*$  is

$$q^* = \arg \min_q \text{KL}(p(\tilde{x}|x)p_d(x)||q(x|\tilde{x})\tilde{p}_d(\tilde{x})) \quad (30)$$

$$= \arg \min_q \left\langle \text{KL}(p(x|\tilde{x})||q(x|\tilde{x})) \right\rangle_{\tilde{p}(\tilde{x})} \quad (31)$$

$$= \arg \min_q \left\langle \text{KL}(\mathcal{N}(\mu_p, \Sigma_p)||q(x|\tilde{x})) + \text{H}(\mathcal{N}(\mu_p, \Sigma_p)) - \text{H}(p(x|\tilde{x})) \right\rangle_{\tilde{p}(\tilde{x})} \quad (32)$$

$$= \arg \min_q \left\langle \text{KL}(\mathcal{N}(\mu_p, \Sigma_p)||q(x|\tilde{x})) \right\rangle_{\tilde{p}(\tilde{x})} + \text{const.} \quad (33)$$

Therefore, the optimal  $q(x|\tilde{x}) = \mathcal{N}(\mu_q(\tilde{x}), \Sigma_q(\tilde{x}))$  under the joint KL has the mean and covariance  $\mu_q^*(\tilde{x}) = \mu_p(\tilde{x}), \Sigma_q^*(\tilde{x}) = \Sigma_p(\tilde{x})$ .

## B Connection to Analytical DDPM

Paper [2] considers the constrained variational family  $q_\theta(x|\tilde{x}) = \mathcal{N}(\mu_\theta(\tilde{x}), \sigma_q^2 I)$  and derive the optimal  $\sigma_q^*$  as

$$\sigma_q^{*2} = \arg \min_{\sigma_q} \text{KL}(p(\tilde{x}|x)p_d(x)||q_\theta(x|\tilde{x})\tilde{p}_d(\tilde{x})) = \frac{1}{d} \left\langle \text{Tr}(\text{Cov}_{q(x|\tilde{x})}[x]) \right\rangle_{\tilde{p}_d(\tilde{x})}, \quad (34)$$

which can also be rewritten using the score function

$$\sigma_q^{*2} = \sigma^2 - \frac{\sigma^4}{d} \left\langle \|s_{q_\theta}(\tilde{x})\|_2^2 \right\rangle_{\tilde{p}_d(\tilde{x})}. \quad (35)$$

To make a deep connection, we can also plug our analytical full covariance (Equation 11) into Equation 17

$$\begin{aligned} \sigma_q^{*2} &= \sigma^2 + \frac{\sigma^4}{d} \text{Tr} \left\langle \nabla_x^2 \log q_\theta(\tilde{x}) \right\rangle_{\tilde{p}_d(\tilde{x})} \\ &= \sigma^2 - \frac{\sigma^4}{d} \text{Tr} \left\langle s_{q_\theta}(\tilde{x}) s_{q_\theta}(\tilde{x})^T \right\rangle_{\tilde{p}_d(\tilde{x})} = \sigma^2 - \frac{\sigma^4}{d} \left\langle \|s_{q_\theta}(\tilde{x})\|_2^2 \right\rangle_{\tilde{p}_d(\tilde{x})}, \end{aligned} \quad (36)$$

which recovers Equation 18, where the first equality is due to the well-known Fisher information identity [9].

## C Experiments

All the experiments conducted in this paper are run on one single NVIDIA GTX 3090.

### C.1 Effect of the Single Noise Choice on MNIST

Figure 10 shows the samples generated by our method with the EBM trained with difference  $\sigma \in \{0.3, 0.5, 0.8\}$  in the noise distribution  $p(\tilde{x}|x)$ , we can find the image quality also heavily depends on the choice of the noise scale and  $\sigma = 0.5$  achieves the best visual quality, we then use this hyper-parameter in the subsequent comparisons.

### C.2 Multi-level Noise Details

For full details on the architecture and noise schedule used in the multi-level noise experiments in Section 5, we refer to Appendix B of [33]. For our multi-level Gibbs sampling procedure, we used 3 Gibbs steps at each noise level and 3 Rademacher samples for each diagonal Hessian computation. Following [33], we used a total of 232 noise levels, distributed according to their proposed geometric schedule, and applied a final denoising step in which the mean of the clean distribution conditioned on the final output of the sampling procedure is returned (the final output of the sampling procedure is a sample from the noised distribution from the noise distribution at the smallest noise level). This denoising step was previously found to improve FID scores [16] significantly.

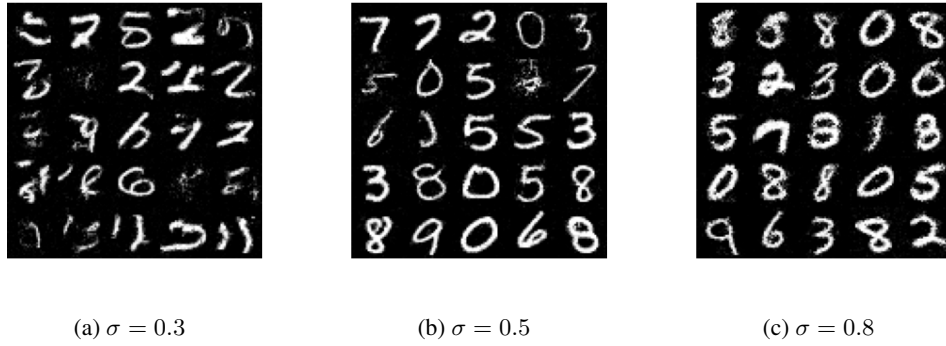

Figure 10: Sample comparisons with different  $\sigma$  value.

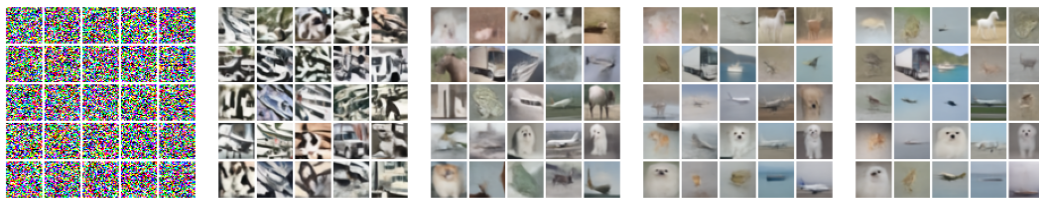

Figure 11: Mode Collapse visualization of 25 Markov chains, we plot the samples every 20 Gibbs steps, we can find less modes are covered if we run the Gibbs sampling for a longer time.
